# Supplementary material for: Platform for isolation and characterization of SARS-CoV-2 variants enables rapid characterization of Omicron in Australia
Source: PubMed Central journal article supplement (PMC9159941; doi:10.1038/s41564-022-01135-7), 2022-05-30

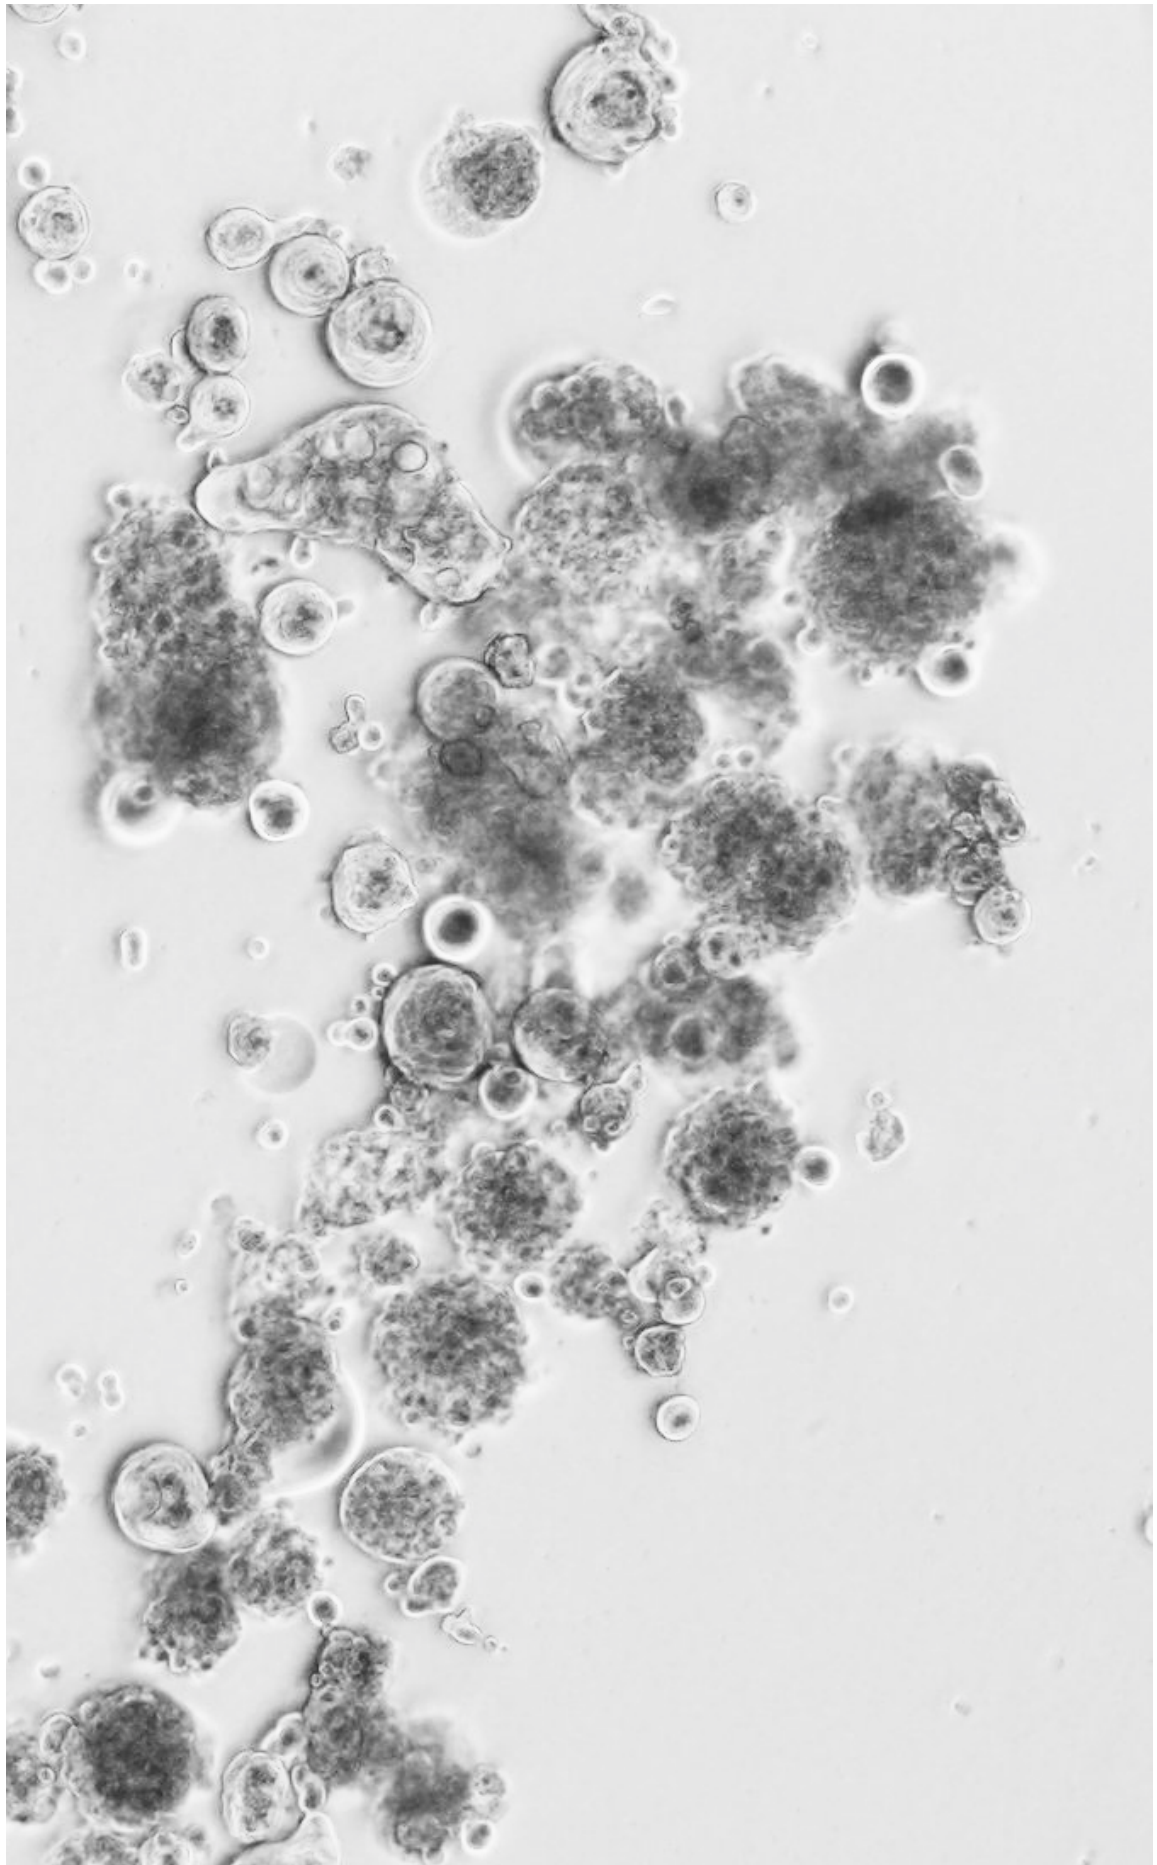

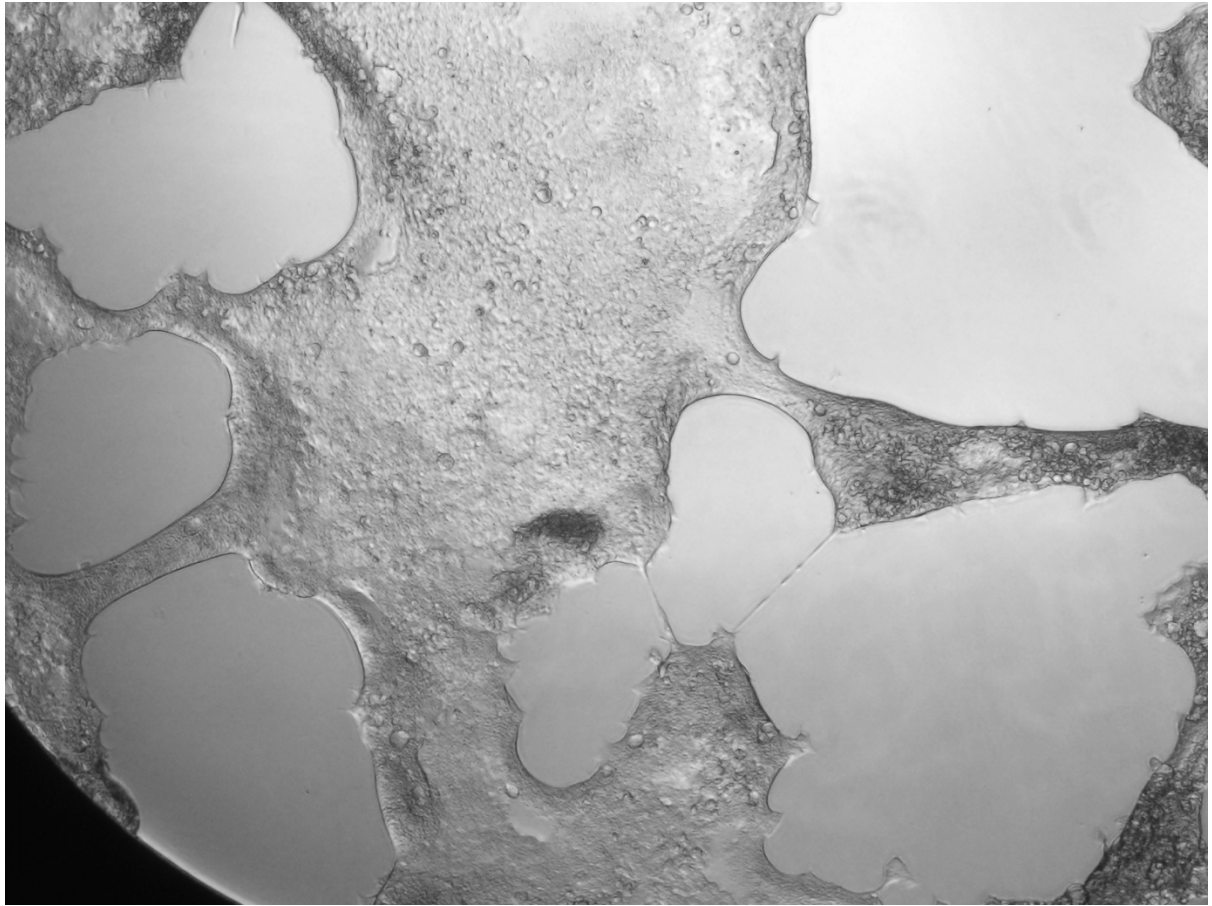

Supplement: 41564_2022_1135_MOESM15_ESM.pdf [file 41564_2022_1135_MOESM15_ESM.pdf]
